# Supplementary material for: Impact of Age and Sex on COVID-19 Severity Assessed From Radiologic and Clinical Findings
Source: PubMed Central journal article supplement (PMC8913498; doi:10.3389/fcimb.2021.777070), 2022-02-25
Supplement: DataSheet_1.pdf [file DataSheet_1.pdf]

**Supplemental Table 1. Comparison of subjects with regards to age groups and gender, Abu Dhabi Emirate**

|                                       | Total<br>n=605        | Both sexes              |                         |                     | P1-3          | All ages                |                        |               | 18-39 years             |                        |                  | 40-64 years             |                        |               | ≥65 years               |                       |               |
|---------------------------------------|-----------------------|-------------------------|-------------------------|---------------------|---------------|-------------------------|------------------------|---------------|-------------------------|------------------------|------------------|-------------------------|------------------------|---------------|-------------------------|-----------------------|---------------|
|                                       |                       | 18-39<br>n1=341(56.36%) | 40-64<br>n2=253(41.82%) | ≥65<br>n3=11(1.82%) |               | Female<br>n4=86(14.21%) | Male<br>n5=519(85.79%) | P4-5          | Female<br>n6=47(13.78%) | Male<br>n7=294(86.22%) | P6-7             | Female<br>n8=33(13.04%) | Male<br>n9=220(86.96%) | P8-9          | Female<br>n10=6(54.55%) | Male<br>n11=5(45.45%) | P10-11        |
| Age                                   | 39.78[31.26-47.38]    | 31.57±5.26*             | 49.33±6.36*             | 74.79±8.38*         | <0.001        | 40.91±14.09             | 39.6±11.0              | 0.4515        | 30.9±5.18               | 31.68±5.26             | 0.1677           | 48.83±6.42              | 49.41±6.35             | 0.2740        | 75.76±8.13              | 73.64±8.52            | 0.4271        |
| BMI                                   | 28.02[23.76-28.78]    | 27.57±19.04*            | 28.65±21.61*            | 27.36±5.68          | <b>0.0076</b> | 27.18±5.54              | 28.15±21.42            | 0.3379        | 25.76±4.95              | 27.84±20.29            | 0.1147           | 28.61±5.56              | 28.66±23.08            | <b>0.0530</b> | 29.54±6.48              | 24.74±2.84            | 0.2057        |
| Temperature, °C                       | 36.82[36.6-37.0]      | 36.79±0.37              | 36.86±0.39              | 36.73±0.29          | 0.1484        | 36.81±0.36              | 36.82±0.38             | 0.4743        | 36.76±0.26              | 36.79±0.39             | 0.4820           | 36.92±0.45              | 36.85±0.38             | 0.1704        | 36.58±0.3               | 36.9±0.13             | <b>0.0578</b> |
| SBP                                   | 135.83[124.0-150.0]   | 134.63±20.31*           | 137.78±26.87*           | 128.34±34.82        | <b>0.0118</b> | 129.4±21.68             | 136.9±23.82            | <b>0.0001</b> | 123.86±21.05            | 136.34±19.65           | <b>&lt;0.001</b> | 135.76±16.81            | 138.09±28.07           | 0.0914        | 136.97±34.57            | 117.98±32.19          | 0.2057        |
| DBP                                   | 81.17[73.0-92.0]      | 81.33±14.94*            | 81.98±20.41*            | 57.8±21.94*         | <b>0.0002</b> | 78.42±16.23             | 81.62±18.09            | <b>0.0227</b> | 77.2±15.09              | 81.98±14.81            | <b>0.0335</b>    | 84.09±13.39             | 81.66±21.25            | 0.4070        | 56.67±18.48             | 59.16±25.41           | 0.4636        |
| <b>OXYGENATION</b>                    |                       |                         |                         |                     |               |                         |                        |               |                         |                        |                  |                         |                        |               |                         |                       |               |
| SpO2                                  | 0.99[0.98-1.0]        | 0.99±0.01*              | 0.98±0.03*              | 0.96±0.04*          | <0.001        | 0.99±0.01               | 0.99±0.02              | 0.0932        | 0.99±0.01               | 0.99±0.01              | <b>0.0497</b>    | 0.99±0.01               | 0.98±0.03              | 0.2823        | 0.97±0.03               | 0.95±0.04             | 0.3883        |
| Heart beat rate                       | 85.47[76.0-93.0]      | 84.92±14.72             | 86.17±13.97             | 86.82±10.94         | 0.3793        | 88.33±13.85             | 85.0±14.39             | <b>0.0237</b> | 86.13±14.34             | 84.72±14.78            | 0.3068           | 91.72±12.55             | 85.34±13.98            | <b>0.0047</b> | 87.17±13.07             | 86.4±7.61             | 0.2911        |
| Breath rate                           | 18.26[18.0-18.0]      | 17.97±1.6*              | 18.51±2.85*             | 21.55±5.05*         | <0.001        | 18.15±1.69              | 18.28±2.45             | 0.4910        | 17.91±1.63              | 17.98±1.59             | 0.3369           | 18.18±1.49              | 18.56±3.0              | 0.3810        | 19.83±2.19              | 23.6±6.53             | 0.3161        |
| Anion gap                             | 17.31[16.5-18.3]      | 17.3±2.73               | 17.39±2.44              | 15.29±3.47*         | 0.0663        | 17.2±2.1                | 17.32±2.72             | 0.2421        | 17.27±1.8               | 17.31±2.85             | 0.2102           | 17.7±1.43               | 17.34±2.55             | 0.1329        | 13.87±3.78              | 17.42±1.03            | <b>0.0211</b> |
| Increased anion gap                   | 503(83.14%)           | 285(83.58%)             | 213(84.19%)             | 5(45.45%)*          | <b>0.0008</b> | 72(83.72%)              | 431(83.04%)            | 0.8036        | 39(82.98%)              | 246(83.67%)            | 0.9098           | 31(93.94%)              | 182(82.73%)            | 0.2520        | 2(33.33%)               | 3(60.0%)              | na            |
| <b>BIOCHEMICAL DATA ON ADMISSION</b>  |                       |                         |                         |                     |               |                         |                        |               |                         |                        |                  |                         |                        |               |                         |                       |               |
| <b>Electrolytes</b>                   |                       |                         |                         |                     |               |                         |                        |               |                         |                        |                  |                         |                        |               |                         |                       |               |
| - K <sup>+</sup>                      | 4.03[3.8-4.3]         | 4.0±0.35*               | 4.08±0.4*               | 4.01±0.38           | <b>0.0376</b> | 3.92±0.36               | 4.05±0.37              | <b>0.0021</b> | 3.86±0.34               | 4.02±0.35              | <b>0.0046</b>    | 3.98±0.37               | 4.09±0.4               | 0.0604        | 4.03±0.41               | 3.97±0.33             | 0.4576        |
| - Na <sup>+</sup>                     | 139.36[138.0-141.0]   | 139.7±2.13*             | 138.91±3.03*            | 139.5±2.42          | <b>0.0090</b> | 139.05±2.42             | 139.42±2.6             | 0.0997        | 139.06±2.03             | 139.8±2.13             | <b>0.0176</b>    | 139.0±2.9               | 138.9±3.05             | 0.3659        | 139.17±2.27             | 140.0±2.55            | 0.4151        |
| - HCO <sub>3</sub> <sup>-</sup>       | 25.04[23.7-26.3]      | 25.14±3.08              | 24.82±2.7               | 26.99±5.26          | 0.2087        | 24.07±2.88              | 25.2±2.97              | <0.001        | 23.47±2.06              | 25.41±3.13             | <b>0.0001</b>    | 24.03±2.11              | 24.94±2.75             | <b>0.0228</b> | 23.97±5.87              | 24.02±1.63            | 0.0829        |
| - Cl <sup>-</sup>                     | 101.05[99.4-102.9]    | 101.24±2.49             | 100.78±3.18             | 101.23±3.38         | 0.3572        | 101.7±2.99              | 100.94±2.78            | <b>0.0034</b> | 102.18±3.13             | 101.09±2.34            | <b>0.0006</b>    | 101.26±2.52             | 100.71±3.26            | 0.1915        | 100.37±3.46             | 102.52±2.8            | 0.1687        |
| - Ca <sup>2+</sup>                    | 2.35[2.29-2.42]       | 2.36±0.1*               | 2.33±0.11*              | 2.32±0.1            | <b>0.0002</b> | 2.33±0.1                | 2.35±0.1               | 0.0538        | 2.35±0.1                | 2.37±0.1               | 0.3943           | 2.29±0.08               | 2.34±0.11              | <b>0.0054</b> | 2.38±0.05               | 2.24±0.1              | 0.1080        |
| - Mg <sup>2+</sup>                    | 0.84[0.79-0.89]       | 0.84±0.07               | 0.85±0.08               | 0.77±0.03*          | <b>0.0029</b> | 0.81±0.07               | 0.85±0.08              | <b>0.0002</b> | 0.8±0.07                | 0.85±0.07              | <b>0.0006</b>    | 0.8±0.08                | 0.85±0.08              | 0.0951        | 0.79±0.02               | 0.77±0.01             | <b>0.0351</b> |
| - Phosphate                           | 1.12[0.95-1.27]       | 1.14±0.23*              | 1.1±0.23                | 1.0±0.2             | 0.0577        | 1.08±0.17               | 1.12±0.24              | 0.0862        | 1.1±0.14                | 1.14±0.25              | 0.1149           | 1.06±0.2                | 1.1±0.23               | 0.1890        | 1.09±0.17               | 0.88±0.18             | 0.0890        |
| <b>Substrates</b>                     |                       |                         |                         |                     |               |                         |                        |               |                         |                        |                  |                         |                        |               |                         |                       |               |
| CRP                                   | 9.89[0.8-6.3]         | 6.51±18.47*             | 13.48±28.26*            | 32.36±47.17         | <0.001        | 17.1±33.58              | 8.71±22.14             | <b>0.0264</b> | 12.9±31.79              | 5.53±15.2              | 0.3173           | 21.23±33.6              | 12.31±27.17            | <b>0.0182</b> | 25.95±40.98             | 40.06±52.63           | 0.4635        |
| D-Dimer                               | 0.37[0.19-0.37]       | 0.34±0.42*              | 0.41±0.41*              | 0.6±0.47            | <0.001        | 0.57±0.76               | 0.34±0.32              | <0.001        | 0.65±0.93               | 0.29±0.20              | <0.001           | 0.47±0.46               | 0.4±0.41               | <b>0.0393</b> | 0.4±0.51                | 0.8±0.51              | 0.1059        |
| Ferritin                              | 360.79[127.75-411.25] | 282.4±334.96*           | 456.49±538.78*          | 756.38±1150.01      | <0.001        | 169.0±433.04            | 391.32±457.43          | <0.001        | 87.4±73.2               | 312.03±348.96          | <0.001           | 280.87±663.04           | 483.31±511.91          | <0.001        | 179.25±152.93           | 1333.5±1398.4         | <b>0.0303</b> |
| Total protein                         | 78.08[75.0-82.0]      | 78.67±5.51*             | 77.32±4.82*             | 75.33±2.05          | <b>0.0132</b> | 77.82±5.24              | 78.13±5.2              | 0.4778        | 77.61±6.53              | 78.84±5.3              | 0.2284           | 78.36±4.12              | 77.16±4.9              | 0.0991        | 75.5±2.5                | 75.0±0.0              | 0.2701        |
| Albumin                               | 39.94[38.0-43.0]      | 41.25±3.92*             | 38.36±4.83*             | 35.14±5.46*         | <0.001        | 38.39±4.7               | 40.2±4.54              | <b>0.0002</b> | 39.05±5.2               | 41.63±3.51             | <b>0.0003</b>    | 37.61±3.88              | 38.47±4.95             | 0.0810        | 36.75±2.59              | 33.0±7.26             | 0.4286        |
| Urea                                  | 4.09[3.0-4.6]         | 3.73±1.1*               | 4.46±2.68*              | 6.95±3.51*          | <0.001        | 3.38±1.33               | 4.21±2.11              | <0.001        | 3.04±0.93               | 3.84±1.08              | <0.001           | 3.42±0.93               | 4.62±2.82              | <b>0.0002</b> | 5.92±2.59               | 8.5±4.09              | 0.1679        |
| Creatinine                            | 81.11[66.0-87.0]      | 76.73±21.76             | 87.2±74.49              | 78.2±34.75          | 0.1688        | 56.71±12.08             | 85.18±54.05            | <0.001        | 56.26±10.69             | 80.08±21.29            | <0.001           | 56.24±10.2              | 91.9±78.8              | <0.001        | 62.83±24.13             | 101.25±35.49          | 0.0549        |
| Uric acid                             | 306.38[253.0-353.0]   | 311.87±77.43*           | 298.71±89.69*           | 307.0±117.69        | <b>0.0419</b> | 263.05±84.53            | 313.45±81.32           | <0.001        | 253.16±61.87            | 321.15±75.55           | <0.001           | 264.83±95.21            | 303.9±87.66            | <b>0.0050</b> | 356.0±136.76            | 258.0±64.8            | 0.2352        |
| Total bilirubin, umol/L               | 8.99[5.7-10.4]        | 8.81±4.96               | 9.26±7.02               | 7.64±3.88           | 0.4129        | 6.44±3.9                | 9.39±6.05              | <0.001        | 6.03±3.49               | 9.26±5.02              | <0.001           | 7.18±4.5                | 9.56±7.26              | <b>0.0006</b> | 5.25±1.15               | 9.23±4.23             | 0.3864        |
| Direct bilirubin, umol/L              | 3.54[2.3-3.9]         | 3.3±1.56                | 3.89±5.6                | 3.62±2.48           | 0.2393        | 2.9±2.46                | 3.65±3.96              | <0.001        | 2.6±1.35                | 3.41±1.57              | <0.001           | 3.44±3.58               | 3.95±5.83              | <b>0.0012</b> | 2.1±0.2                 | 5.15±2.75             | 0.1226        |
| Glucose random                        | 6.41[5.05-6.54]       | 5.77±1.65*              | 7.31±3.19*              | 6.8±1.97            | <0.001        | 6.57±2.79               | 6.38±2.47              | 0.1449        | 5.97±2.12               | 5.74±1.56              | 0.1568           | 7.38±3.45               | 7.3±3.14               | 0.3467        | 7.24±2.26               | 5.92±0.53             | 0.4085        |
| <b>Enzymes</b>                        |                       |                         |                         |                     |               |                         |                        |               |                         |                        |                  |                         |                        |               |                         |                       |               |
| G6PDH                                 | 10.9[9.9-12.4]        | 10.89±3.42              | 10.93±2.84              | 9.9±7.1             | 0.7419        | 12.46±3.17              | 10.59±3.21             | <b>0.0002</b> | 12.69±3.21              | 10.54±3.35             | <b>0.0014</b>    | 11.75±3.02              | 10.79±2.78             | 0.0919        | 14.8±1.9                | 0.1±0.0               | 0.2701        |
| LDH                                   | 227.02[181.0-244.0]   | 215.35±62.39*           | 241.63±99.37*           | 263.29±145.39       | <b>0.0030</b> | 220.99±62.92            | 227.95±85.13           | 0.3504        | 201.83±38.62            | 217.45±65.05           | 0.1592           | 254.96±79.93            | 239.83±101.58          | 0.1036        | 188.0±14.61             | 363.67±177.21         | 0.2979        |
| Alkaline phosphatase                  | 80.64[63.25-86.0]     | 82.29±57.01             | 78.38±31.12             | 82.6±41.56          | 0.6253        | 80.38±38.98             | 80.69±48.95            | 0.4212        | 82.19±47.71             | 82.3±58.41             | 0.1497           | 79.75±19.56             | 78.18±32.42            | 0.0970        | 54.5±20.5               | 101.33±41.48          | 0.3835        |
| Amylase                               | 79.83[55.0-90.0]      | 78.54±61.96             | 80.37±40.22             | 115.88±78.88        | 0.4678        | 69.47±27.62             | 81.55±57.75            | <b>0.0195</b> | 71.3±29.16              | 79.71±65.65            | 0.1930           | 65.4±24.69              | 82.68±41.63            | <b>0.0104</b> | 80.0±26.11              | 151.75±95.85          | 0.2352        |
| Lipase                                | 41.26[25.0-45.0]      | 34.95±15.93*            | 49.6±60.36*             | 59.0±80.43          | <b>0.0001</b> | 33.13±12.35             | 42.61±45.1             | <b>0.0189</b> | 33.02±12.23             | 35.26±16.43            | 0.2946           | 33.6±13.0               | 52.06±64.28            | <b>0.0073</b> | 30.75±7.29              | 96.67±111.98          | 0.2979        |
| <b>HAEMATOLOGIC DATA ON ADMISSION</b> |                       |                         |                         |                     |               |                         |                        |               |                         |                        |                  |                         |                        |               |                         |                       |               |
| Platelet                              | 260.17[208.0-302.0]   | 259.75±67.55            | 258.33±83.58            | 313.09±153.88       | 0.4076        | 283.41±92.5             | 256.43±73.92           | <b>0.0060</b> | 280.57±84.21            | 256.57±64.03           | 0.0708           | 266.45±67.5             | 257.14±85.62           | 0.0950        | 391.83±163.25           | 218.6±61.19           | <b>0.0276</b> |
| <b>Leucocytes</b>                     |                       |                         |                         |                     |               |                         |                        |               |                         |                        |                  |                         |                        |               |                         |                       |               |
| WBC                                   | 6.87[5.3-8.1]         | 6.9±2.28                | 6.82±1.98               | 6.99±1.3            | 0.8866        | 7.14±2.81               | 6.83±2.03              | 0.3588        | 7.84±3.16               | 6.77±2.09              | <b>0.0450</b>    | 6.12±2.14               | 6.92±1.93              | <b>0.0397</b> | 7.3±1.08                | 6.47±1.46             | 0.2755        |
| Lymphocytes, abs                      | 2.17[1.58-2.68]       | 2.26±0.81*              | 2.05±0.81*              | 1.77±0.6            | <b>0.0012</b> | 2.15±0.75               | 2.17±0.82              | 0.4222        | 2.32±0.71               | 2.25±0.82              | 0.1492           | 1.95±0.76               | 2.07±0.81              | 0.2428        | 1.91±0.67               | 1.61±0.46             | 0.3240        |
| Lymphocytes, %                        | 32.42[24.48-39.3]     | 33.92±10.53*            | 30.66±10.11*            | 26.11±13.53*        | <b>0.0002</b> | 32.3±12.42              | 32.44±10.25            | 0.3734        | 32.75±11.95             | 34.1±10.29             | 0.2185           | 32.55±12.36             | 30.38±9.7              | 0.1880        | 27.67±14.96             | 24.2±11.29            | 0.4636        |
| Baso, abs                             | 0.03[0.02-0.04]       | 0.03±0.02               | 0.03±0.02               | 0.04±0.03           | 0.6136        | 0.03±0.02               | 0.03±0.02              | 0.2184        | 0.03±0.02               | 0.03±0.02              | 0.1829           | 0.03±0.02               | 0.03±0.02              | 0.2879        | 0.05±0.03               | 0.02±0.01             | 0.0514        |
| Baso, %                               | 0.43[0.3-0.6]         | 0.42±0.23               | 0.44±0.26               | 0.48±0.36           | 0.6938        | 0.45±0.25               | 0.43±0.24              | 0.4946        | 0.41±0.19               | 0.42±0.24              | 0.4946           | 0.44±0.25               | 0.44±0.25              | 0.3854        | 0.67±0.39               | 0.26±0.08             | <b>0.0071</b> |
| Eos, abs                              | 0.17[0.05-0.21]       | 0.18±0.24               | 0.17±0.23               | 0.17±0.15           | 0.8590        | 0.11±0.12               | 0.18±0.25              | <b>0.0060</b> | 0.12±0.12               | 0.19±0.25              | 0.0567           | 0.14±0.12               | 0.18±0.24              | <b>0.0137</b> | 0.13±0.07               | 0.21±0.19             | 0.4274        |
| Eos, %                                | 2.43[0.8-3.0]         | 2.51±3.24               | 2.32±2.68               | 2.35±2.09           | 0.8266        | 1.63±1.51               | 2.56±3.16              | <b>0.0049</b> | 1.65±1.51               | 2.64±3.41              | <b>0.0261</b>    | 1.65±1.56               | 2.43±2.78              | <b>0.0319</b> |                         |                       |               |

**Supplemental Table 2. Comparison of clinical findings in patients with regards to age group and gender, Dubai Emirate**

|                                            | Total<br>n <sub>1</sub> =560 | Both sexes                           |                                      |                                  | P <sub>1-3</sub> | All ages                              |                                     |                  | 18-39 years                           |                                     |                  | 40-64 years                          |                                     |                  | ≥65 years                             |                                     |                    |
|--------------------------------------------|------------------------------|--------------------------------------|--------------------------------------|----------------------------------|------------------|---------------------------------------|-------------------------------------|------------------|---------------------------------------|-------------------------------------|------------------|--------------------------------------|-------------------------------------|------------------|---------------------------------------|-------------------------------------|--------------------|
|                                            |                              | 18-39<br>n <sub>1</sub> =292(52.14%) | 40-64<br>n <sub>2</sub> =236(42.14%) | ≥65<br>n <sub>3</sub> =32(5.71%) |                  | Female<br>n <sub>4</sub> =189(33.75%) | Male<br>n <sub>5</sub> =371(66.25%) | P <sub>4-5</sub> | Female<br>n <sub>6</sub> =119(40.75%) | Male<br>n <sub>7</sub> =173(59.25%) | P <sub>6-7</sub> | Female<br>n <sub>8</sub> =55(23.31%) | Male<br>n <sub>9</sub> =181(76.69%) | P <sub>8-9</sub> | Female<br>n <sub>10</sub> =15(46.88%) | Male<br>n <sub>11</sub> =17(53.12%) | P <sub>10-11</sub> |
| Age                                        | 39.0[33.0-49.0]              | 33.0±4.8*                            | 47.0±7.16*                           | 70.0±7.06*                       | <0.001           | 36.0±13.17                            | 41.0±12.26                          | <0.0027          | 33.0±4.57                             | 33.0±4.95                           | 0.3532           | 47.0±8.1                             | 47.0±6.85                           | 0.4546           | 70.0±3.77                             | 69.0±8.89                           | 0.2781             |
| BMI                                        | 27.02[23.88-30.44]           | 26.03±5.72*                          | 27.73±4.57*                          | 31.0±4.5*                        | <0.0001          | 25.29±5.9                             | 27.29±4.94                          | <0.0015          | 24.0±5.83                             | 27.07±5.43                          | <0.0013          | 47.0±8.1                             | 47.0±6.85                           | 0.2615           | 33.2±3.28                             | 27.96±3.11                          | <0.0179            |
| Temperature, °C                            | 37.0[37.0-37.9]              | 37.0±0.6*                            | 37.0±0.81*                           | 37.0±0.63                        | <0.0024          | 37.0±0.6                              | 37.0±0.75                           | <0.0092          | 37.0±0.47                             | 37.0±0.67                           | <0.0211          | 37.0±0.76                            | 37.0±0.82                           | 0.3187           | 37.0±0.61                             | 37.0±0.65                           | 0.3713             |
| SBP                                        | 124.0[114.0-135.0]           | 120.0±13.6*                          | 127.5±18.84*                         | 128.5±16.72*                     | <0.001           | 119.0±18.05                           | 126.0±15.54                         | <0.001           | 117.0±13.58                           | 124.0±13.1                          | <0.0001          | 120.0±23.87                          | 129.0±16.89                         | <0.0134          | 131.0±16.22                           | 124.0±17.08                         | 0.4029             |
| DBP                                        | 78.0[70.0-84.0]              | 76.0±9.55*                           | 78.0±11.68*                          | 70.0±11.3*                       | <0.001           | 75.0±10.92                            | 78.0±10.67                          | <0.0012          | 75.0±9.47                             | 78.0±9.48                           | <0.0179          | 78.0±13.39                           | 78.0±11.04                          | 0.1019           | 75.0±9.85                             | 70.0±12.41                          | 0.3179             |
| <b>OXYGENATION</b>                         |                              |                                      |                                      |                                  |                  |                                       |                                     |                  |                                       |                                     |                  |                                      |                                     |                  |                                       |                                     |                    |
| Heart rate, BPM                            | 85.0[78.0-95.0]              | 85.0±12.24                           | 86.0±14.36*                          | 80.5±17.48*                      | <0.0192          | 84.0±11.65                            | 85.0±14.56                          | 0.2453           | 84.0±11.89                            | 86.0±12.42                          | 0.1523           | 87.0±10.53                           | 85.0±15.34                          | 0.3094           | 81.0±12.3                             | 80.0±20.29                          | 0.2361             |
| Breath rate, /min                          | 18.0[18.0-18.0]              | 18.0±2.22*                           | 18.0±4.81*                           | 18.0±5.04*                       | <0.001           | 18.0±2.57                             | 18.0±4.26                           | <0.0016          | 18.0±0.89                             | 18.0±2.76                           | <0.022           | 18.0±2.03                            | 18.0±5.28                           | <0.0017          | 22.0±6.29                             | 18.0±2.22                           | <0.0129            |
| SOFA score                                 | 0.0[0.0-0.0]                 | 0.0±0.74*                            | 0.0±2.14*                            | 1.0±2.54*                        | <0.001           | 0.0±1.02                              | 0.0±1.93                            | <0.0001          | 0.0±0.2                               | 0.0±0.94                            | <0.0016          | 0.0±1.15                             | 0.0±2.32                            | <0.0046          | 2.0±2.08                              | 1.0±2.88                            | 0.1513             |
| <b>COMORBIDITIES</b>                       |                              |                                      |                                      |                                  |                  |                                       |                                     |                  |                                       |                                     |                  |                                      |                                     |                  |                                       |                                     |                    |
| Current smoking                            | 36(6.43%)                    | 24(8.22%)                            | 10(4.24%)                            | 2(6.25%)                         | 0.1789           | 5(2.65%)                              | 31(8.36%)                           | <0.0098          | 2(1.68%)                              | 22(12.72%)                          | <0.0004          | 2(3.64%)                             | 8(4.42%)                            | 1                | 1(6.67%)                              | 1(5.88%)                            | na                 |
| Chronic Cardiac disease                    | 20(3.57%)                    | 20(6.88%)*                           | 6(2.54%)                             | 12(37.5%)*                       | <0.001           | 5(2.65%)                              | 15(4.04%)                           | 0.4774           | 2(1.68%)                              | 11(6.36%)                           | 0.0814           | 1(1.82%)                             | 5(2.76%)                            | na               | 2(13.33%)                             | 10(58.82%)                          | <0.0118            |
| Hypertension                               | 115(20.54%)                  | 13(4.45%)*                           | 75(31.78%)*                          | 27(84.38%)*                      | <0.001           | 36(19.05%)                            | 79(21.29%)                          | 0.581            | 2(1.68%)                              | 11(6.36%)                           | 0.0629           | 21(38.18%)                           | 54(29.83%)                          | 0.2514           | 13(86.67%)                            | 14(82.5%)                           | 1                  |
| Asthma                                     | 38(6.79%)                    | 21(7.19%)                            | 12(5.08%)                            | 5(15.62%)                        | 0.0778           | 23(12.17%)                            | 15(4.04%)                           | <0.0006          | 13(10.92%)                            | 8(4.62%)                            | 0.5341           | 6(10.91%)                            | 6(3.31%)                            | <0.0357          | 4(26.67%)                             | 1(5.88%)                            | na                 |
| Diabetes                                   | 98(17.5%)                    | 11(3.77%)*                           | 63(26.69%)*                          | 24(75.0%)*                       | <0.001           | 28(14.81%)                            | 70(18.87%)                          | 0.2424           | 3(2.52%)                              | 8(4.62%)                            | 0.5341           | 14(25.45%)                           | 49(27.07%)                          | 0.8635           | 11(73.33%)                            | 13(76.47%)                          | 1                  |
| <b>DISEASE COURSE AND SEVERITY</b>         |                              |                                      |                                      |                                  |                  |                                       |                                     |                  |                                       |                                     |                  |                                      |                                     |                  |                                       |                                     |                    |
| <b>Clinical severity</b>                   |                              |                                      |                                      |                                  | <0.001           |                                       |                                     | <0.029           |                                       |                                     | <0.0158          |                                      |                                     | 0.328            |                                       |                                     | 0.169              |
| - Asymp/Mild/Moderate                      | 431(76.96%)                  | 265(90.75%)*                         | 154(65.25%)*                         | 12(37.5%)*                       |                  | 158(83.6%)*                           | 273(73.58%)*                        |                  | 115(96.64%)*                          | 150(86.71%)*                        |                  | 39(70.91%)                           | 115(63.54%)                         |                  | 4(26.67%)                             | 8(47.06%)                           |                    |
| - Severe                                   | 83(14.82%)                   | 20(6.85%)*                           | 51(21.61%)*                          | 12(37.5%)*                       |                  | 20(10.58%)*                           | 63(16.98%)*                         |                  | 3(2.52%)*                             | 17(9.83%)*                          |                  | 12(21.82%)                           | 39(21.55%)                          |                  | 5(33.33%)                             | 7(41.18%)                           |                    |
| - Critical                                 | 46(8.21%)                    | 7(2.4%)*                             | 31(13.14%)*                          | 8(25.0%)*                        |                  | 11(5.82%)*                            | 35(9.43%)*                          |                  | 10(8.4%)*                             | 6(4.0%)*                            |                  | 4(7.27%)                             | 27(14.92%)                          |                  | 6(40.0%)*                             | 2(11.76%)                           |                    |
| Need O <sub>2</sub> supplementation at adm | 82(14.64%)                   | 15(5.14%)*                           | 53(22.46%)*                          | 14(43.75%)*                      | <0.001           | 16(8.47%)*                            | 66(17.9%)*                          | <0.0034          | 10(8.4%)*                             | 14(8.09%)*                          | <0.0055          | 6(10.91%)                            | 47(25.97%)*                         | <0.0257          | 9(60.0%)*                             | 5(29.41%)*                          | 0.1527             |
| Need O <sub>2</sub> supplementation later  | 112(20.0%)                   | 25(8.56%)*                           | 70(29.66%)*                          | 17(53.12%)*                      | <0.001           | 26(13.76%)*                           | 86(23.18%)*                         | <0.0099          | 3(2.52%)*                             | 22(12.72%)*                         | <0.0023          | 12(21.82%)                           | 58(32.04%)*                         | 0.1782           | 11(73.33%)*                           | 6(35.29%)*                          | <0.0416            |
| Admitted directly to ICU                   | 56(10.0%)                    | 10(3.42%)*                           | 38(16.1%)*                           | 8(25.0%)*                        | <0.001           | 9(4.76%)*                             | 47(12.67%)*                         | <0.0027          | 10(8.4%)*                             | 9(5.2%)*                            | 0.0521           | 3(5.45%)*                            | 35(19.34%)*                         | <0.012           | 5(33.33%)*                            | 3(17.65%)*                          | na                 |
| Transferred to ICU later                   | 72(12.86%)                   | 14(4.79%)*                           | 47(19.92%)*                          | 11(34.38%)*                      | <0.001           | 14(7.41%)*                            | 58(15.63%)*                         | <0.0072          | 2(1.68%)*                             | 12(6.94%)*                          | <0.0499          | 4(7.27%)*                            | 43(23.76%)*                         | <0.0065          | 8(53.33%)*                            | 3(17.65%)*                          | 0.0617             |
| Duration of ICU stay                       | 0.0[0.0-0.0]                 | 0.0±1.96*                            | 0.0±7.6*                             | 0.0±6.7*                         | <0.001           | 0.0±2.57                              | 0.0±4.81                            | <0.0024          | 0.0±0.78                              | 0.0±2.44                            | <0.019           | 0.0±2.68                             | 0.0±8.46                            | <0.0036          | 2.0±5.91                              | 0.0±12.04                           | <0.0473            |
| Onset to hospitalization, days             | 14.0[8.0-19.0]               | 11.0±5.87*                           | 16.0±12.08*                          | 23.0±21.79*                      | <0.001           | 13.0±6.75                             | 14.0±11.62                          | 0.1122           | 12.0±5.25                             | 9.0±6.25                            | <0.0102          | 14.0±8.49                            | 17.0±12.82                          | <0.0075          | 19.0±6.4                              | 25.0±14.64                          | <0.028             |
| Onset to positive PCR, days                | 2.0[1.0-5.0]                 | 2.0±2.74*                            | 3.0±4.65*                            | 4.0±7.62*                        | <0.0002          | 2.0±3.2                               | 2.0±4.59                            | 0.3964           | 2.0±2.77                              | 2.0±2.71                            | 0.3105           | 3.0±4.9                              | 3.0±4.9                             | 0.429            | 3.5±4.7                               | 6.0±9.52                            | 0.0916             |
| Duration of viral shedding                 | 10.0[6.0-14.0]               | 10.0±5.38                            | 10.0±6.97                            | 11.0±5.4                         | 0.6554           | 10.0±5.31                             | 10.0±6.47                           | 0.1331           | 10.0±5.16                             | 10.0±5.52                           | 0.4275           | 8.0±5.73                             | 10.0±7.26                           | 0.0574           | 11.0±4.52                             | 12.5±5.71                           | 0.1241             |
| Length of disease, days                    | 14.0[10.0-18.0]              | 13.0±5.4*                            | 14.0±8.02                            | 18.0±4.84*                       | <0.0009          | 13.0±5.51                             | 14.0±7.36                           | 0.0635           | 13.0±5.37                             | 13.0±5.42                           | 0.3403           | 15.0±5.88                            | 15.0±8.45                           | <0.0259          | 15.0±4.59                             | 20.5±4.24                           | <0.0467            |
| <b>Outcome</b>                             |                              |                                      |                                      |                                  | <0.001           |                                       |                                     | 0.5904           |                                       |                                     |                  |                                      |                                     | 0.4601           |                                       |                                     | <0.0149            |
| - alive                                    | 545(97.32%)                  | 292(100.0%)*                         | 226(95.76%)*                         | 27(84.38%)*                      | <0.001           | 183(96.83%)*                          | 362(97.57%)*                        | 0.5904           | 54(96.64%)*                           | 150(86.71%)*                        |                  | 54(98.18%)*                          | 172(95.03%)*                        | 0.4601           | 10(66.67%)*                           | 17(100.0%)*                         | <0.0149            |
| - deceased                                 | 15(2.68%)                    | 0(0.0%)*                             | 10(4.24%)*                           | 5(15.62%)*                       |                  | 6(3.17%)*                             | 9(2.43%)*                           |                  | 1(1.82%)*                             | 17(9.83%)*                          |                  | 1(1.82%)*                            | 9(4.97%)*                           |                  | 5(33.33%)*                            | 0(0.0%)*                            |                    |
| <b>COMPLICATIONS</b>                       |                              |                                      |                                      |                                  |                  |                                       |                                     |                  |                                       |                                     |                  |                                      |                                     |                  |                                       |                                     |                    |
| - Any complications                        | 123(21.96%)                  | 33(11.3%)*                           | 73(30.93%)*                          | 17(53.12%)*                      | <0.001           | 24(12.7%)*                            | 99(26.68%)*                         | <0.0001          | 5(4.2%)*                              | 28(16.18%)*                         | <0.0012          | 9(16.36%)*                           | 64(35.36%)*                         | <0.0076          | 10(66.67%)*                           | 7(41.18%)*                          | 0.1777             |
| - Count                                    | 0.0[0.0-0.0]                 | 0.0±0.65*                            | 0.0±2.32*                            | 1.0±2.98*                        | <0.001           | 0.0±1.35                              | 0.0±2.0                             | <0.0001          | 0.0±0.33                              | 0.0±0.79                            | <0.0007          | 0.0±1.27                             | 0.0±2.52                            | <0.003           | 1.0±3.03                              | 0.0±2.81                            | 0.072              |
| ARDS                                       | 76(13.57%)                   | 14(4.79%)*                           | 51(21.61%)*                          | 11(34.38%)*                      | <0.001           | 16(8.47%)*                            | 60(16.17%)*                         | <0.0128          | 2(1.68%)*                             | 12(6.94%)*                          | <0.0499          | 6(10.91%)*                           | 45(24.86%)*                         | <0.0383          | 8(53.33%)*                            | 3(17.65%)*                          | 0.0617             |
| Bacterial pneumonia                        | 15(2.68%)                    | 20(6.88%)*                           | 11(4.66%)*                           | 2(6.25%)*                        | <0.0083          | 8(4.23%)*                             | 15(4.04%)*                          | <0.0037          | 2(1.68%)*                             | 2(1.16%)*                           | na               | 11(19.27%)*                          | 11(6.08%)*                          | 0.072            | 2(13.33%)*                            | 2(11.76%)*                          | na                 |
| Liver dysfunction                          | 54(9.64%)                    | 22(7.53%)*                           | 30(12.71%)*                          | 2(6.25%)*                        | 0.1073           | 8(4.23%)*                             | 46(12.4%)*                          | <0.0014          | 3(2.52%)*                             | 19(10.98%)*                         | <0.0065          | 3(5.45%)*                            | 27(14.92%)*                         | 0.0684           | 2(13.33%)*                            | 27(156.1%)*                         | na                 |
| Acute renal injury                         | 47(8.39%)                    | 6(2.05%)*                            | 30(12.71%)*                          | 11(34.38%)*                      | <0.001           | 10(5.29%)*                            | 37(9.97%)*                          | 0.0753           | 10(8.4%)*                             | 5(2.89%)*                           | na               | 3(5.45%)*                            | 27(14.92%)*                         | 0.0684           | 6(40.0%)*                             | 5(29.41%)*                          | 0.712              |
| Septic Shock                               | 25(4.46%)                    | 20(6.88%)*                           | 17(7.2%)*                            | 6(18.75%)*                       | <0.001           | 5(2.65%)*                             | 20(5.39%)*                          | 0.1932           | 5(4.2%)*                              | 2(1.16%)*                           | na               | 1(1.82%)*                            | 16(8.84%)*                          | 0.1315           | 4(26.67%)*                            | 2(11.76%)*                          | na                 |
| Seizure                                    | 5(0.89%)                     | 1(0.34%)*                            | 4(1.69%)*                            | na                               |                  | 1(0.53%)*                             | 4(1.08%)*                           | na               | 1(0.84%)*                             | 1(0.58%)*                           | na               | 1(1.82%)*                            | 3(1.66%)*                           | na               | 2(13.33%)*                            | na                                  | na                 |
| <b>Cardiac complications</b>               |                              |                                      |                                      |                                  |                  |                                       |                                     |                  |                                       |                                     |                  |                                      |                                     |                  |                                       |                                     |                    |
| Myocarditis                                | 2(0.36%)                     | na                                   | 2(0.85%)*                            | na                               |                  | na                                    | 2(0.54%)*                           | na               | na                                    | na                                  | na               | na                                   | na                                  | na               | 2(1.1%)*                              | na                                  | na                 |
| New onset Cardiomyopathy                   | 30(5.4%)                     | na                                   | 3(1.24%)*                            | na                               |                  | na                                    | 3(0.81%)*                           | na               | na                                    | na                                  | na               | na                                   | na                                  | na               | 3(1.66%)*                             | na                                  | na                 |
| Cardiac arrhythmia                         | 15(2.68%)                    | 1(0.34%)*                            | 10(4.24%)*                           | 4(12.5%)*                        | <0.001           | 6(3.17%)*                             | 9(2.43%)*                           | 0.5904           | 1(0.84%)*                             | na                                  | na               | 2(3.64%)*                            | 8(4.42%)*                           | 1                | 3(20.0%)*                             | 1(5.88%)*                           | na                 |
| Cardiac arrest                             | 14(2.5%)                     | na                                   | 10(4.24%)*                           | 4(12.5%)*                        | <0.001           | 5(2.65%)*                             | 9(2.43%)*                           | 1                | na                                    | na                                  | na               | 1(1.82%)*                            | 9(4.97%)*                           | 0.4601           | 4(26.67%)*                            | na                                  | na                 |
| GCS                                        | 15.0[15.0-15.0]              | 15.0±0.7*                            | 15.0±2.17                            | 15.0±2.97*                       | <0.001           | 15.0±1.38                             | 15.0±1.81                           | 0.4751           | 15.0±0.0                              | 15.0±0.91                           | 0.2054           | 15.0±1.91                            | 15.0±2.24                           | 0.3894           | 15.0±3.07                             | 15.0±2.87                           | 0.4449             |
| <b>SYMPTOMS</b>                            |                              |                                      |                                      |                                  |                  |                                       |                                     |                  |                                       |                                     |                  |                                      |                                     |                  |                                       |                                     |                    |
| Cough                                      | 304(54.29%)                  | 134(45.89%)*                         | 155(65.68%)*                         | 15(46.88%)*                      | <0.001           | 96(50.79%)*                           | 208(56.06%)*                        | 0.2447           | 50(42.02%)*                           | 84(48.55%)*                         | 0.2843           | 38(69.09%)*                          | 117(64.64%)*                        | 0.6276           | 8(53.33%)*                            | 7(41.18%)*                          | 0.7235             |
| Sputum                                     | 29(5.18%)                    | 8(2.74%)*                            | 17(6.93%)*                           | 3(9.38%)*                        | <0.0228          | 7(3.7%)*                              | 22(5.93%)*                          | 0.3166           | 2(1.68%)*                             | 6(3.4%)*                            | na               | 2(3.64%)*                            | 16(8.84%)*                          | 0.2575           | 3(20.0%)*                             | na                                  | na                 |
| Sore throat                                | 172(30.71%)                  | 99(33.9%)*                           | 68(28.81%)*                          | 5(15.62%)*                       | 0.0735           | 76(40.21%)*                           | 96(25.88%)*                         | <0.0007          | 49(41.18%)*                           | 50(28.9%)*                          | <0.0329          | 23(41.82%)*                          | 45(24.86%)*                         | <0.0179          | 4(26.67%)*                            | 1(5.88%)*                           | na                 |
| Chest pain                                 | 45(8.04%)                    | 20(6.85%)*                           | 24(10.17%)*                          | 1(3.12%)*                        | 0.2171           | 15(7.94%)*                            | 30(8.09%)*                          | 0.1              | 10(8.4%)*                             | 10(5.78%)*                          | 0.4804           | 4(7.27%)*                            | 20(11.05%)*                         | 0.6106           | 1(6.67%)*                             | na                                  | na                 |
| SOB                                        | 154(27.5%)*                  | 56(19.18%)*                          | 84(35.59%)*                          | 14(43.75%)*                      | <0.001           | 49(25.93%)*                           | 105(28.3%)*                         | 0.617            | 27(22.69%)*                           | 29(16.76%)*                         | 0.2278           | 13(23.64%)*                          | 71(39.23%)*                         | <0.0373          | 9(60.0%)*                             | 5(29.41%)*                          | 0.1527             |
| Fever                                      | 327(58.39%)*                 | 156(53.42%)*                         | 155(65.68%)*                         | 16(50.0%)*                       | <0.0108          | 100(52.91%)*                          | 227(61.19%)*                        |                  |                                       |                                     |                  |                                      |                                     |                  |                                       |                                     |                    |

**Supplemental Table 3. Comparison of laboratory findings in patients with regards to age group and gender, Dubai Emirate**

|                                             | Total<br>n=560      | Both sexes                           |                                      |                                  | p <sub>1-3</sub> | All ages                              |                                     |                  | 18-39 years                           |                                     |                  | 40-64 years                          |                                     |                  | ≥65 years                             |                                     |                    |
|---------------------------------------------|---------------------|--------------------------------------|--------------------------------------|----------------------------------|------------------|---------------------------------------|-------------------------------------|------------------|---------------------------------------|-------------------------------------|------------------|--------------------------------------|-------------------------------------|------------------|---------------------------------------|-------------------------------------|--------------------|
|                                             |                     | 18-39<br>n <sub>1</sub> =292(52.14%) | 40-64<br>n <sub>2</sub> =236(42.14%) | ≥65<br>n <sub>3</sub> =32(5.71%) |                  | Female<br>n <sub>4</sub> =189(33.75%) | Male<br>n <sub>5</sub> =371(66.25%) | P <sub>4-5</sub> | Female<br>n <sub>6</sub> =119(40.75%) | Male<br>n <sub>7</sub> =173(59.25%) | P <sub>6-7</sub> | Female<br>n <sub>8</sub> =55(23.31%) | Male<br>n <sub>9</sub> =181(76.69%) | P <sub>8-9</sub> | Female<br>n <sub>10</sub> =15(46.88%) | Male<br>n <sub>11</sub> =17(53.12%) | P <sub>10-11</sub> |
| <b>BIOCHEMICAL ANALYSIS AND COAGULATION</b> |                     |                                      |                                      |                                  |                  |                                       |                                     |                  |                                       |                                     |                  |                                      |                                     |                  |                                       |                                     |                    |
| <b>Coagulation</b>                          |                     |                                      |                                      |                                  |                  |                                       |                                     |                  |                                       |                                     |                  |                                      |                                     |                  |                                       |                                     |                    |
| APTT on adm (sec)                           | 37.4[35.0-41.0]     | 37.75±4.45                           | 37.0±11.21                           | 40.7±22.91*                      | <0.001           | 38.0±11.09                            | 37.1±9.27                           | 0.3145           | 38.1±4.5                              | 37.3±4.41                           | 0.12             | 36.9±5.1                             | 37.0±12.42                          | 0.234            | 39.5±32.86                            | 41.9±5.06                           | 0.0618             |
| APTT peak                                   | 38.0[35.15-42.25]   | 38.0±13.2                            | 37.5±23.09                           | 44.0±33.13*                      | <0.0002          | 38.5±16.13                            | 37.95±21.34                         | 0.2863           | 38.6±5.83                             | 37.5±16.32                          | 0.1801           | 37.1±5.52                            | 37.8±25.88                          | 0.058            | 40.0±46.79                            | 44.0±6.08                           | 0.1911             |
| <b>Cytokine</b>                             |                     |                                      |                                      |                                  |                  |                                       |                                     |                  |                                       |                                     |                  |                                      |                                     |                  |                                       |                                     |                    |
| IL-6 (pg/mL)                                | 25.0[7.95-34.0]     | 18.0±7.82                            | 26.2±51.58                           | 5.4±0.0                          | 0.6451           | 16.0±16.03                            | 26.2±52.71                          | 0.2436           | 17.0±1.0                              | 33.5±0.0                            | 0.2701           | 30.75±20.25                          | 26.2±54.64                          | 0.4661           |                                       |                                     |                    |
| <b>Substrates</b>                           |                     |                                      |                                      |                                  |                  |                                       |                                     |                  |                                       |                                     |                  |                                      |                                     |                  |                                       |                                     |                    |
| CRP on adm (mg/L)                           | 5.8[1.8-27.0]       | 3.8±37.33*                           | 15.2±69.72*                          | 38.5±94.68*                      | <0.001           | 4.3±41.28                             | 7.5±67.63                           | <0.001           | 3.4±16.78                             | 4.0±46.19                           | <0.0045          | 6.2±36.67                            | 19.05±75.76                         | <0.0085          | 53.0±96.45                            | 34.0±93.05                          | 0.4104             |
| CRP peak (mg/L)                             | 6.5[1.9-50.0]       | 4.0±51.89*                           | 23.4±90.75*                          | 98.0±101.12*                     | <0.001           | 4.7±53.53                             | 8.5±87.8                            | <0.001           | 3.8±30.31                             | 4.2±62.01                           | <0.0038          | 9.0±47.21                            | 38.7±98.26                          | <0.0053          | 86.0±106.0                            | 125.0±96.6                          | 0.44               |
| D-Dimer on admin (ug/L)                     | 0.4[0.2-0.6]        | 0.3±1.6*                             | 0.4±1.36*                            | 1.0±1.51*                        | <0.001           | 0.4±1.05                              | 0.3±1.68                            | 0.185            | 0.3±1.16                              | 0.3±1.82                            | <0.0053          | 0.4±0.52                             | 0.4±1.51                            | 0.2849           | 0.8±1.42                              | 1.1±1.58                            | 0.1608             |
| D-Dimer peak (ug/L)                         | 0.4[0.3-0.7]        | 0.3±2.12*                            | 0.5±4.69*                            | 1.2±5.07*                        | <0.001           | 0.4±2.6                               | 0.4±4.21                            | 0.2727           | 0.3±1.16                              | 0.3±2.53                            | <0.0157          | 0.45±0.7                             | 0.5±5.25                            | 0.1938           | 1.2±6.78                              | 1.1±1.87                            | 0.2759             |
| Fibrinogen on adm (mg/dL)                   | 398.0[330.0-530.0]  | 357.0±220.44*                        | 467.0±171.98*                        | 512.0±159.92*                    | <0.001           | 389.5±258.87                          | 405.0±172.09                        | 0.1125           | 359.0±312.59                          | 349.0±127.63                        | 0.1607           | 413.0±128.98                         | 487.5±179.32                        | 0.0536           | 544.0±135.73                          | 430.5±180.9                         | 0.4002             |
| Fibrinogen Peak (mg/dL)                     | 406.0[332.5-559.0]  | 360.0±234.2*                         | 490.0±489.88*                        | 566.5±157.71*                    | <0.001           | 390.0±262.41                          | 413.0±416.6                         | 0.0638           | 360.0±314.57                          | 361.0±161.67                        | 0.2727           | 432.0±134.29                         | 506.5±542.06                        | 0.0556           | 561.5±146.36                          | 613.0±167.35                        | 0.3147             |
| Ferritin on adm (ng/mL)                     | 222.89[85.0-475.5]  | 141.1±677.75*                        | 308.0±1463.31*                       | 317.93±2443.25*                  | <0.001           | 65.0±162.87                           | 308.0±1491.51                       | <0.001           | 51.0±108.06                           | 250.0±835.21                        | <0.001           | 85.5±188.49                          | 379.0±1616.16                       | <0.001           | 291.0±205.22                          | 326.09±3226.88                      | 0.1631             |
| Ferritin Peak (ng/mL)                       | 235.0[90.38-600.0]  | 144.5±823.53*                        | 354.0±5969.47*                       | 662.5±6029.31*                   | <0.001           | 68.5±2564.05                          | 352.0±4912.64                       | <0.001           | 52.0±162.81                           | 250.0±1011.23                       | <0.001           | 102.0±357.01                         | 428.0±6670.58                       | <0.001           | 658.0±8071.03                         | 667.0±3220.08                       | 0.44               |
| Troponin on adm (ng/mL)                     | 0.0[0.0-0.0]        | 0.0±0.19*                            | 0.0±0.3                              | 0.0±0.04*                        | <0.001           | 0.0±0.07                              | 0.0±0.67                            | <0.0069          | 0.0±0.0                               | 0.0±0.24                            | 0.0806           | 0.0±0.0                              | 0.0±0.91                            | <0.0137          | 0.0±0.02                              | 0.0±0.04                            | 0.2094             |
| Troponin Peak ( )                           | 0.0[0.0-0.0]        | 0.0±0.19*                            | 0.0±1.15*                            | 0.0±0.15*                        | <0.001           | 0.0±0.07                              | 0.0±0.94                            | <0.0291          | 0.0±0.0                               | 0.0±0.25                            | 0.0522           | 0.0±0.06                             | 0.0±1.3                             | <0.024           | 0.0±0.18                              | 0.0±0.1                             | 0.1146             |
| Creatinine on adm (umol/L)                  | 76.0[67.0-89.0]     | 74.0±15.81*                          | 78.0±31.99*                          | 86.0±88.01                       | <0.0008          | 65.0±23.62                            | 84.8±34.15                          | <0.001           | 64.9±8.24                             | 84.0±14.08                          | <0.001           | 66.0±8.53                            | 85.0±34.2                           | <0.001           | 71.0±70.59                            | 90.0±100.56                         | <0.0321            |
| Creatinine Peak (umol/L)                    | 77.85[67.78-91.0]   | 74.1±16.12*                          | 81.0±57.51*                          | 90.0±93.08*                      | <0.001           | 66.0±29.15                            | 86.0±51.41                          | <0.001           | 64.9±8.46                             | 84.7±14.35                          | <0.001           | 66.5±10.35                           | 86.6±63.18                          | <0.001           | 87.0±80.26                            | 93.0±103.07                         | 0.305              |
| Total Bilirubin on Adm (umol/L)             | 9.0[6.0-12.5]       | 8.2±5.43*                            | 10.0±6.8*                            | 9.0±4.07                         | <0.0006          | 6.0±3.83                              | 10.0±6.38                           | <0.001           | 6.0±3.61                              | 9.85±5.8                            | <0.001           | 6.0±4.16                             | 10.4±6.96                           | <0.001           | 8.8±3.79                              | 10.0±4.2                            | 0.177              |
| Total Bilirubin Peak (umol/L)               | 9.8[6.5-14.15]      | 8.7±7.96*                            | 10.75±22.28*                         | 10.0±7.72                        | <0.001           | 6.4±5.61                              | 11.0±18.6                           | <0.001           | 6.1±5.94                              | 10.1±8.57                           | <0.001           | 6.85±4.74                            | 12.25±24.77                         | <0.001           | 10.4±4.83                             | 10.0±9.37                           | 0.279              |
| <b>Enzymes</b>                              |                     |                                      |                                      |                                  |                  |                                       |                                     |                  |                                       |                                     |                  |                                      |                                     |                  |                                       |                                     |                    |
| LDH on adm (U/L)                            | 192.0[159.0-264.0]  | 175.0±112.33*                        | 226.0±195.78*                        | 243.0±140.3*                     | <0.001           | 177.0±84.08                           | 202.5±183.17                        | <0.001           | 165.0±49.68                           | 182.5±134.86                        | <0.001           | 220.0±102.38                         | 226.5±213.73                        | 0.1478           | 237.0±109.85                          | 255.0±163.14                        | 0.27               |
| LDH peak (U/L)                              | 195.0[160.0-280.0]  | 178.0±143.48*                        | 227.0±622.28*                        | 253.0±1305.62*                   | <0.001           | 180.0±615.08                          | 204.5±513.58                        | <0.0001          | 168.0±63.18                           | 182.5±172.84                        | <0.0001          | 226.0±169.08                         | 228.5±697.35                        | 0.1843           | 251.0±1815.24                         | 255.0±164.76                        | 0.3106             |
| ALT on adm (U/L)                            | 28.5[18.0-48.75]    | 25.0±39.49*                          | 31.0±32.42*                          | 24.0±16.71                       | <0.0014          | 17.0±26.69                            | 35.0±37.83                          | <0.001           | 16.0±26.51                            | 36.0±43.59                          | <0.001           | 22.5±28.55                           | 35.0±32.81                          | <0.001           | 23.0±16.53                            | 34.0±16.4                           | 0.1771             |
| ALT peak (U/L)                              | 32.0[19.0-68.0]     | 26.0±63.37*                          | 39.5±476.53*                         | 38.5±1077.57                     | <0.001           | 19.0±4531.67                          | 42.0±382.55                         | <0.001           | 16.0±28.69                            | 38.0±74.96                          | <0.001           | 25.0±49.21                           | 49.5±538.8                          | <0.001           | 38.0±15454.28                         | 39.0±27.06                          | 0.3528             |
| AST on adm (U/L)                            | 24.5[18.0-36.83]    | 22.0±29.04*                          | 27.5±24.27*                          | 27.5±19.37                       | <0.001           | 19.0±18.33                            | 27.5±29.52                          | <0.001           | 18.0±18.65                            | 26.0±33.7                           | <0.001           | 24.0±15.77                           | 29.0±25.76                          | <0.0005          | 23.0±20.43                            | 28.0±18.16                          | 0.187              |
| AST peak (U/L)                              | 26.0[19.0-45.0]     | 23.0±39.2*                           | 29.0±458.01*                         | 41.0±723.15*                     | <0.001           | 20.5±306.36                           | 29.0±366.48                         | <0.001           | 18.0±24.76                            | 27.0±45.63                          | <0.001           | 26.0±31.19                           | 32.0±518.64                         | <0.0081          | 45.0±1034.13                          | 39.0±17.56                          | 0.279              |
| CK on adm (U/L)                             | 106.0[66.0-171.25]  | 98.0±593.21*                         | 121.0±779.65*                        | 100.5±662.89                     | <0.0124          | 68.0±367.45                           | 127.0±788.7                         | <0.001           | 60.0±95.28                            | 124.5±744.67                        | <0.001           | 73.0±649.63                          | 134.5±808.39                        | <0.001           | 99.0±75.4                             | 102.0±919.9                         | 0.4505             |
| CK peak (U/L)                               | 109.0[66.5-197.0]   | 99.0±624.95*                         | 122.0±6413.72*                       | 124.5±673.89                     | <0.0265          | 69.0±993.9                            | 132.0±5169.41                       | <0.001           | 62.0±100.98                           | 127.5±781.98                        | <0.001           | 73.0±1789.62                         | 137.0±7157.57                       | <0.001           | 175.0±218.01                          | 106.0±920.46                        | 0.1499             |
| <b>HAEMATOLOGIC ANALYSIS</b>                |                     |                                      |                                      |                                  |                  |                                       |                                     |                  |                                       |                                     |                  |                                      |                                     |                  |                                       |                                     |                    |
| Platelet on adm x10 <sup>9</sup> /L         | 224.0[180.25-272.0] | 226.5±74.26                          | 222.5±81.08                          | 218.0±99.54                      | 0.4348           | 244.0±79.88                           | 216.0±77.15                         | <0.001           | 247.0±81.75                           | 212.0±64.64                         | <0.001           | 247.0±67.27                          | 216.0±84.33                         | <0.0085          | 212.0±88.36                           | 225.0±104.99                        | 0.1631             |
| Platelet minx10 <sup>9</sup> /L             | 224.0[178.0-272.0]  | 228.5±76.21                          | 221.0±94.6                           | 195.0±111.11                     | 0.1046           | 240.0±83.84                           | 216.0±87.62                         | <0.0002          | 244.0±84.7                            | 217.0±67.09                         | <0.0003          | 236.0±69.03                          | 215.0±100.66                        | <0.0115          | 170.0±97.77                           | 223.0±115.31                        | 0.087              |
| <b>Leukocytes</b>                           |                     |                                      |                                      |                                  |                  |                                       |                                     |                  |                                       |                                     |                  |                                      |                                     |                  |                                       |                                     |                    |
| WBC on adm x10 <sup>9</sup> /L              | 5.8[4.5-7.2]        | 5.8±2.15                             | 5.8±2.86                             | 5.8±2.08                         | 0.4182           | 5.7±2.25                              | 5.8±2.58                            | <0.0134          | 5.9±2.25                              | 5.7±2.09                            | 0.354            | 5.5±2.32                             | 6.0±2.96                            | <0.0045          | 5.7±1.84                              | 5.85±2.24                           | 0.3985             |
| Lowest WBC x10 <sup>9</sup> /L              | 5.5[4.1-7.2]        | 5.65±2.25                            | 5.4±1.14                             | 4.9±1.86                         | 0.2541           | 5.4±2.49                              | 5.5±9.0                             | <0.0279          | 5.7±2.54                              | 5.6±2.03                            | 0.3527           | 5.1±2.45                             | 5.4±12.61                           | <0.0141          | 4.9±1.93                              | 5.05±1.78                           | 0.3609             |
| Lymphocytes on adm x10 <sup>9</sup> /L      | 1.57[1.06-2.1]      | 1.8±0.76*                            | 1.43±0.71*                           | 1.16±0.83*                       | <0.001           | 1.6±0.8                               | 1.5±0.74                            | 0.0698           | 1.7±0.83                              | 1.8±0.7                             | 0.4752           | 1.57±0.7                             | 1.39±0.71                           | 0.1127           | 1.3±0.59                              | 1.06±0.99                           | 0.3599             |
| Lymphocytes min x10 <sup>9</sup> /L         | 1.49[0.89-2.08]     | 1.7±0.8*                             | 1.34±0.78*                           | 0.85±0.89*                       | <0.001           | 1.54±0.84                             | 1.48±0.81                           | 0.0817           | 1.67±0.85                             | 1.72±0.76                           | 0.3666           | 1.43±0.76                            | 1.3±0.78                            | 0.1295           | 0.83±0.61                             | 0.88±1.07                           | 0.403              |
| <b>Red blood cells</b>                      |                     |                                      |                                      |                                  |                  |                                       |                                     |                  |                                       |                                     |                  |                                      |                                     |                  |                                       |                                     |                    |
| Hemoglobin on adm (g/l)                     | 13.7[12.5-14.7]     | 13.75±1.62*                          | 13.8±8.37                            | 11.8±1.95*                       | <0.001           | 12.5±1.23                             | 14.4±6.73                           | <0.001           | 12.6±1.14                             | 14.6±1.31                           | <0.001           | 12.3±1.25                            | 14.1±9.47                           | <0.001           | 11.2±1.42                             | 12.0±2.29                           | 0.2665             |
